# Supplementary material for: Synthesis and bactericidal properties of porphyrins immobilized in a polyacrylamide support: influence of metal complexation on photoactivity
Source: Royal Society of Chemistry journal article supplement (doi:10.1039/c6tb03198f), 2017-01-01
Supplement: c6tb03198f1.pdf [file c6tb03198f1.pdf]

## Electronic supplementary information (ESI)

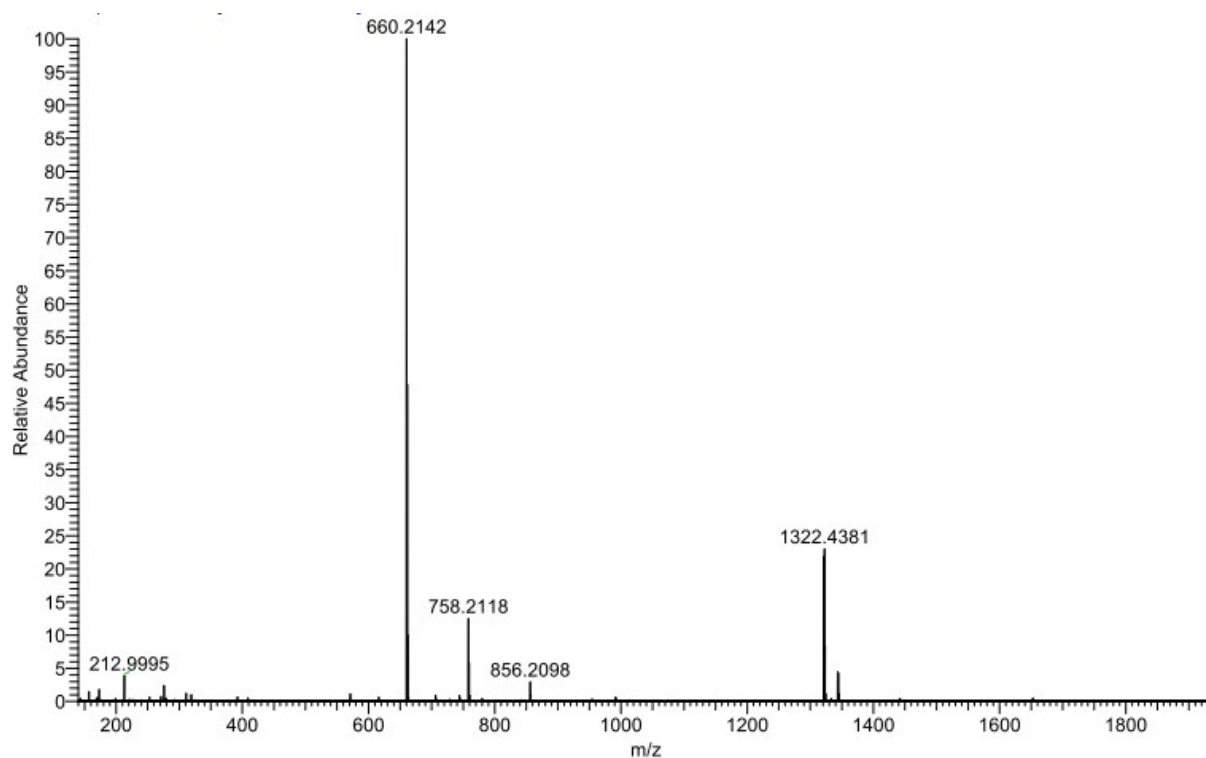

**Figure S1.** ESI-MS ( $m/z$ )(MeOH/MeOH + DEA): calcd. for **2**  $C_{42}H_{26}N_7O_2$ : 661.2142 found (M-H) $^-$ : 660.2153.

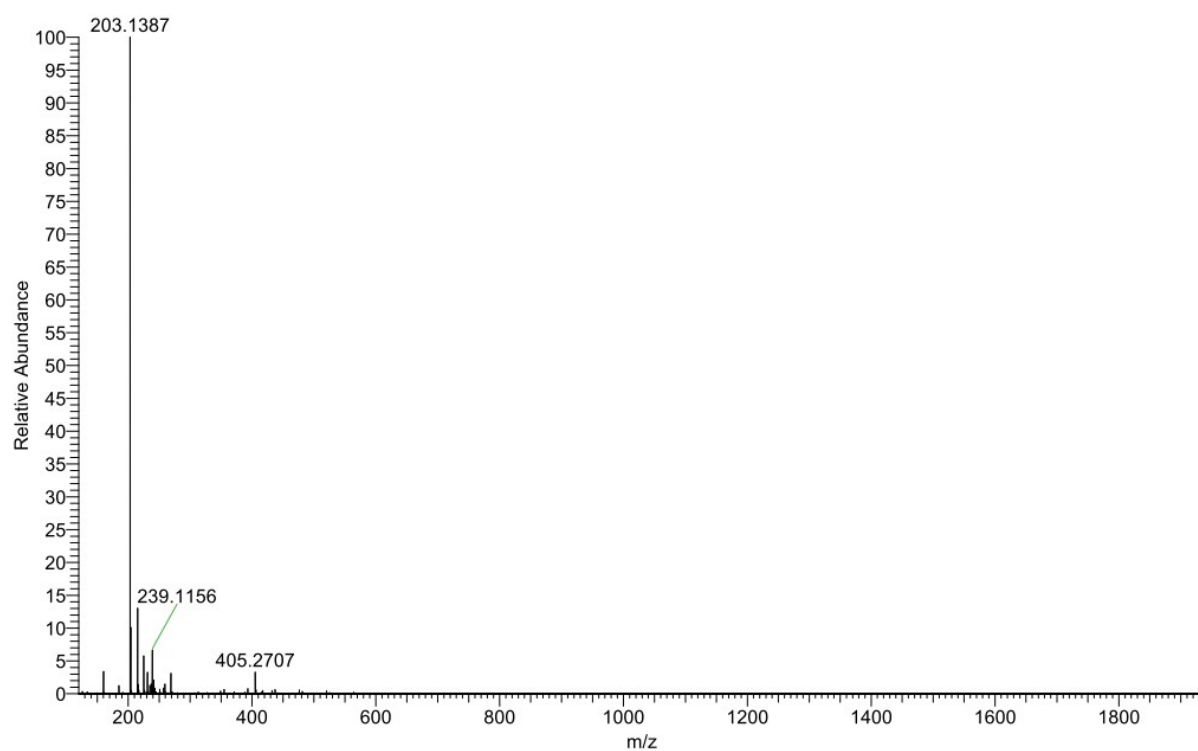

**Figure S2.** ESI-MS (m/z) (MeOH + NH<sub>4</sub>OAc): calcd. for **3** (C<sub>9</sub>H<sub>19</sub>N<sub>2</sub>O<sub>3</sub>): 202.1387; found (MH)<sup>+</sup>: 203.1387

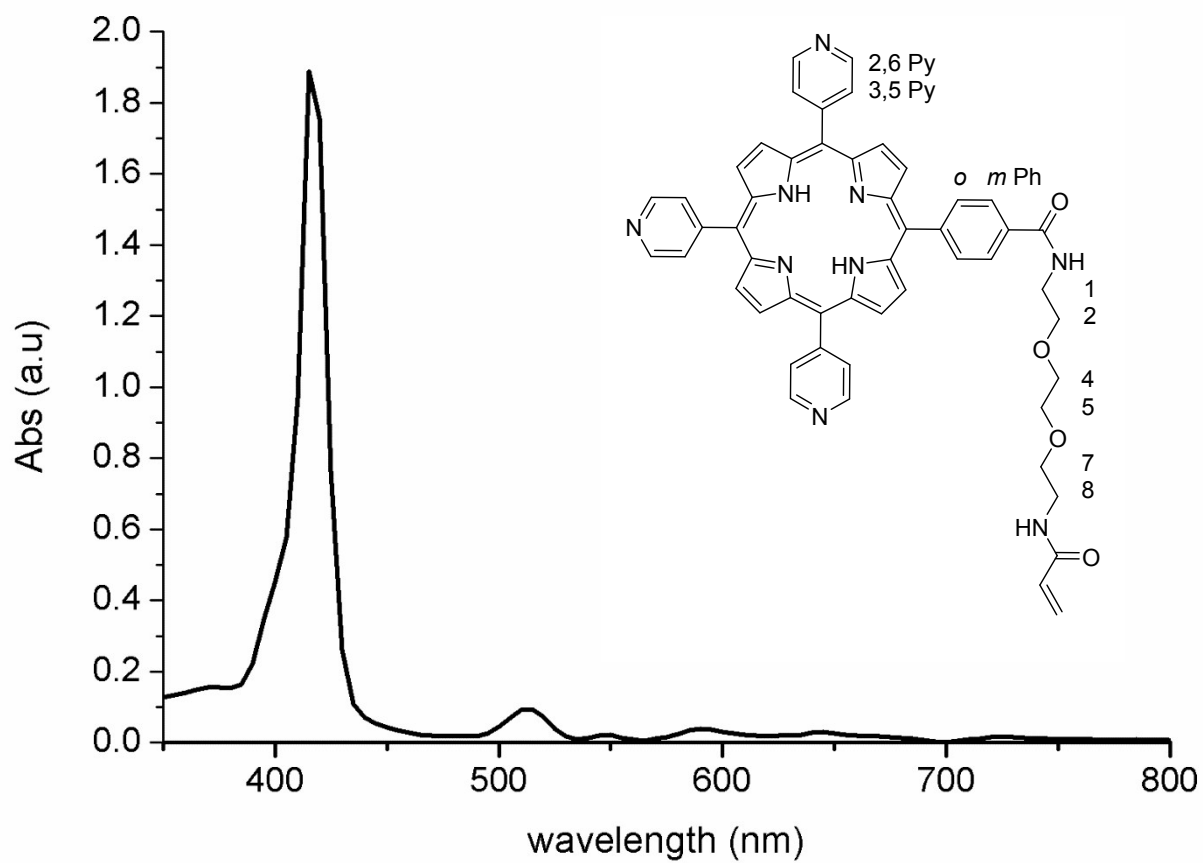

**Figure S3.** Absorption spectra of **4** in  $\text{CH}_2\text{Cl}_2$ .

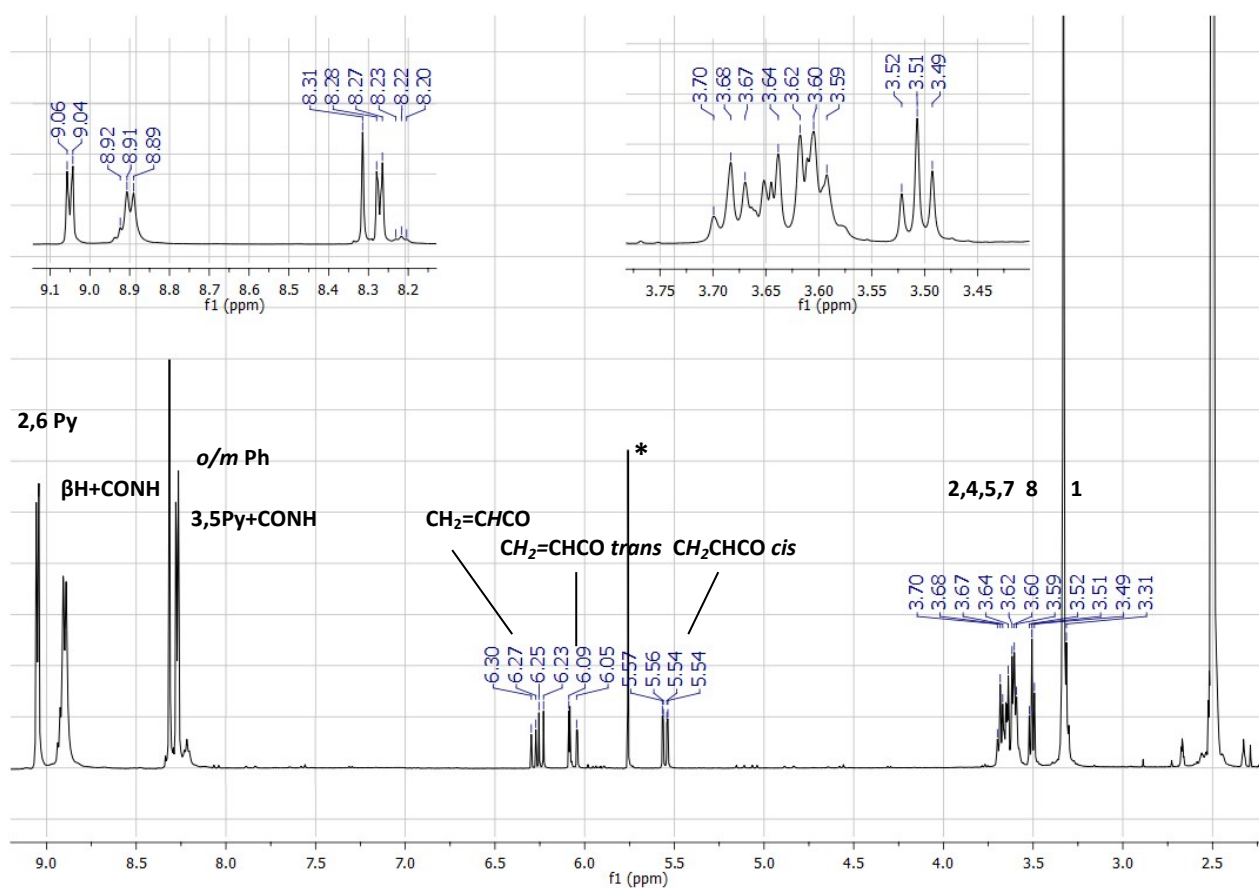

**Figure S4.** <sup>1</sup>H NMR spectrum of 4 in DMSO-*d*<sub>6</sub> \* = impurity (CH<sub>2</sub>Cl<sub>2</sub>)

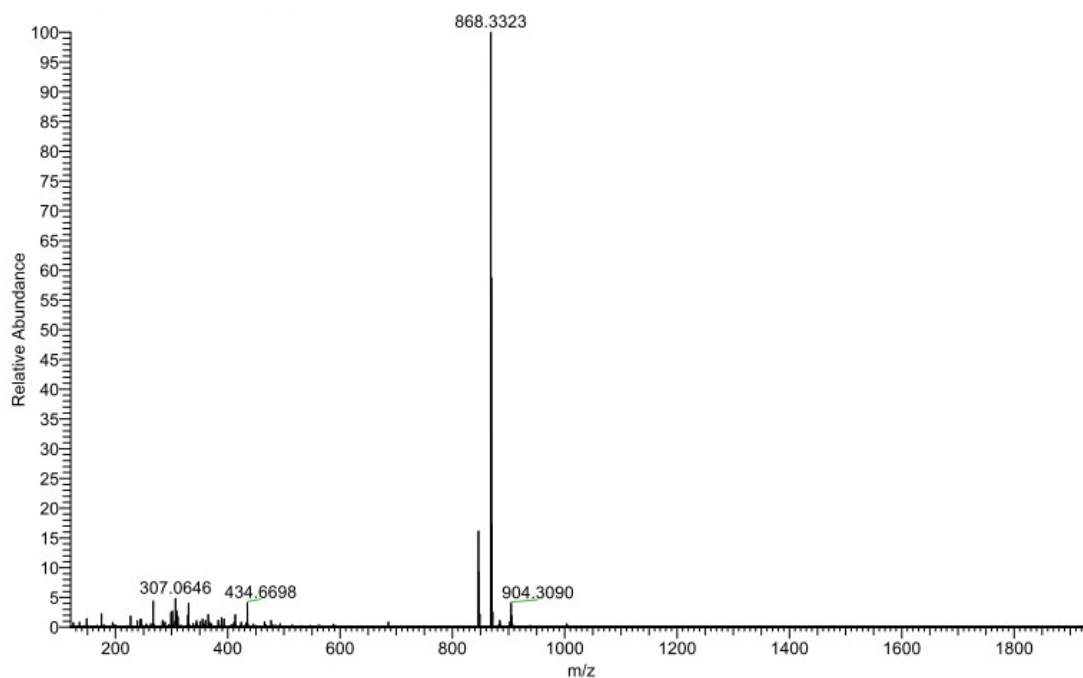

**Figure S5.** ESI-MS (m/z) (MeOH + NH<sub>4</sub>OAc): calcd. for 4 (C<sub>51</sub>H<sub>43</sub>N<sub>9</sub>O<sub>4</sub>): 845.34; found (M+ Na<sup>+</sup>) 868.3330.

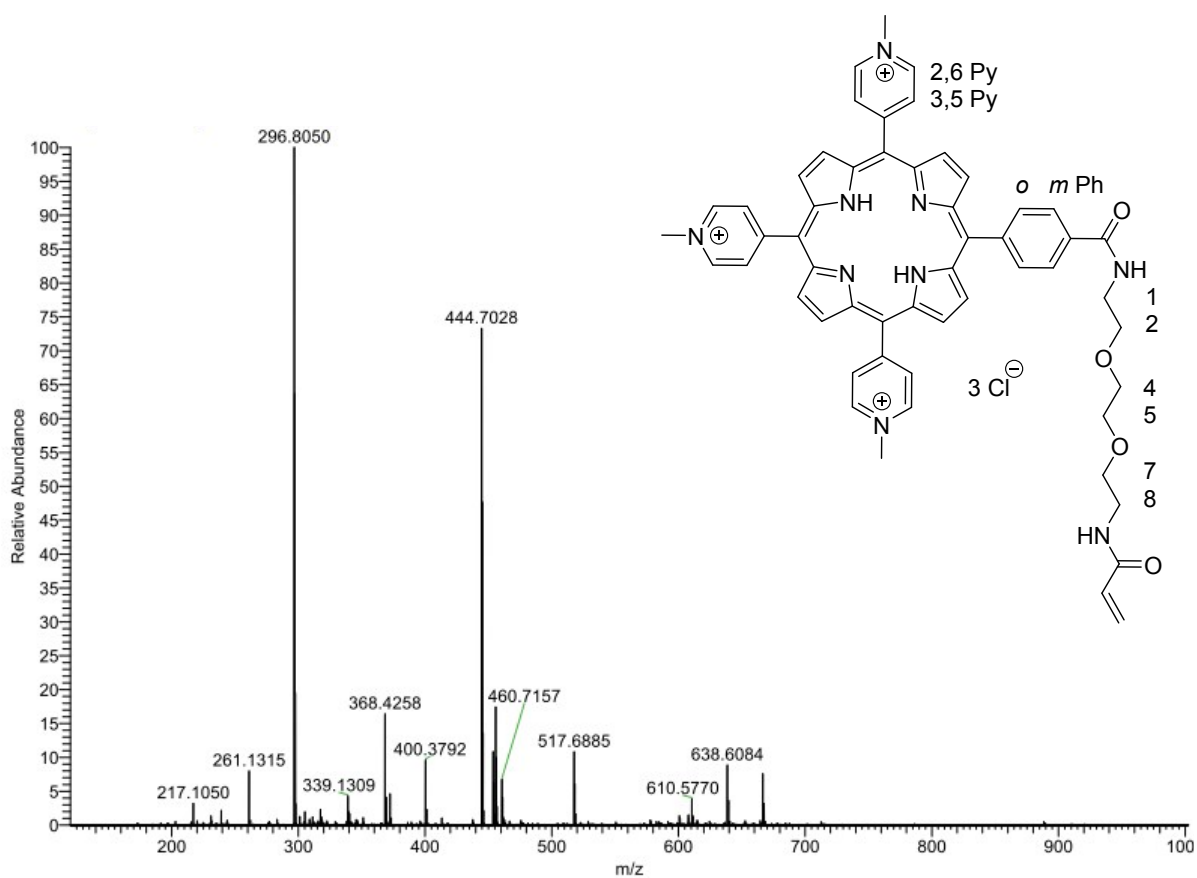

**Figure S6.** ESI-MS (m/z) (MeOH + NH<sub>4</sub>OAc): calcd. for **5** (C<sub>54</sub>H<sub>52</sub>N<sub>9</sub>O<sub>4</sub> Cl<sub>3</sub>): 296.8050 (z=3); found (M – 3Cl)<sup>3+</sup> 296.8042.

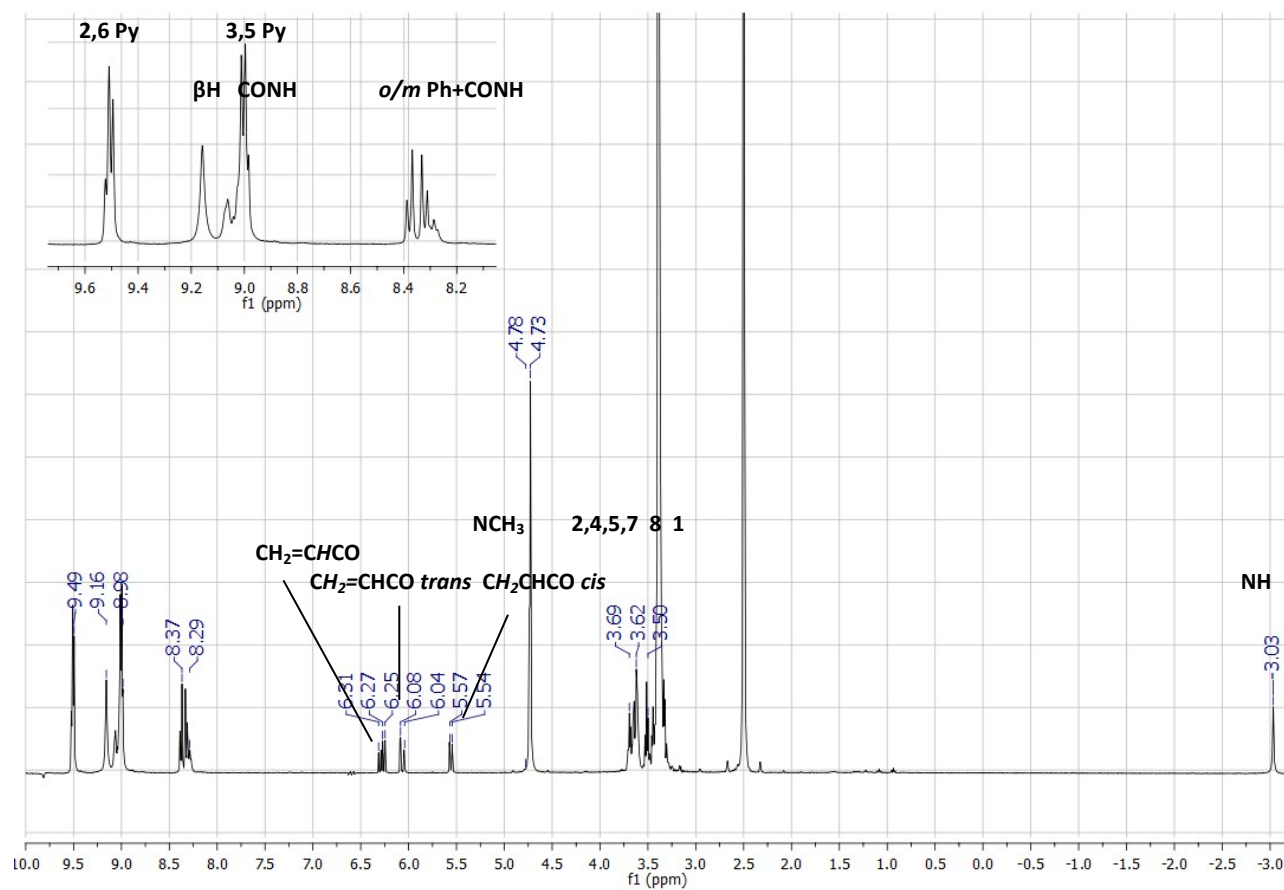

**Figure S7.**  $^1\text{H}$  NMR spectrum of **5** in  $\text{DMSO}-d_6$

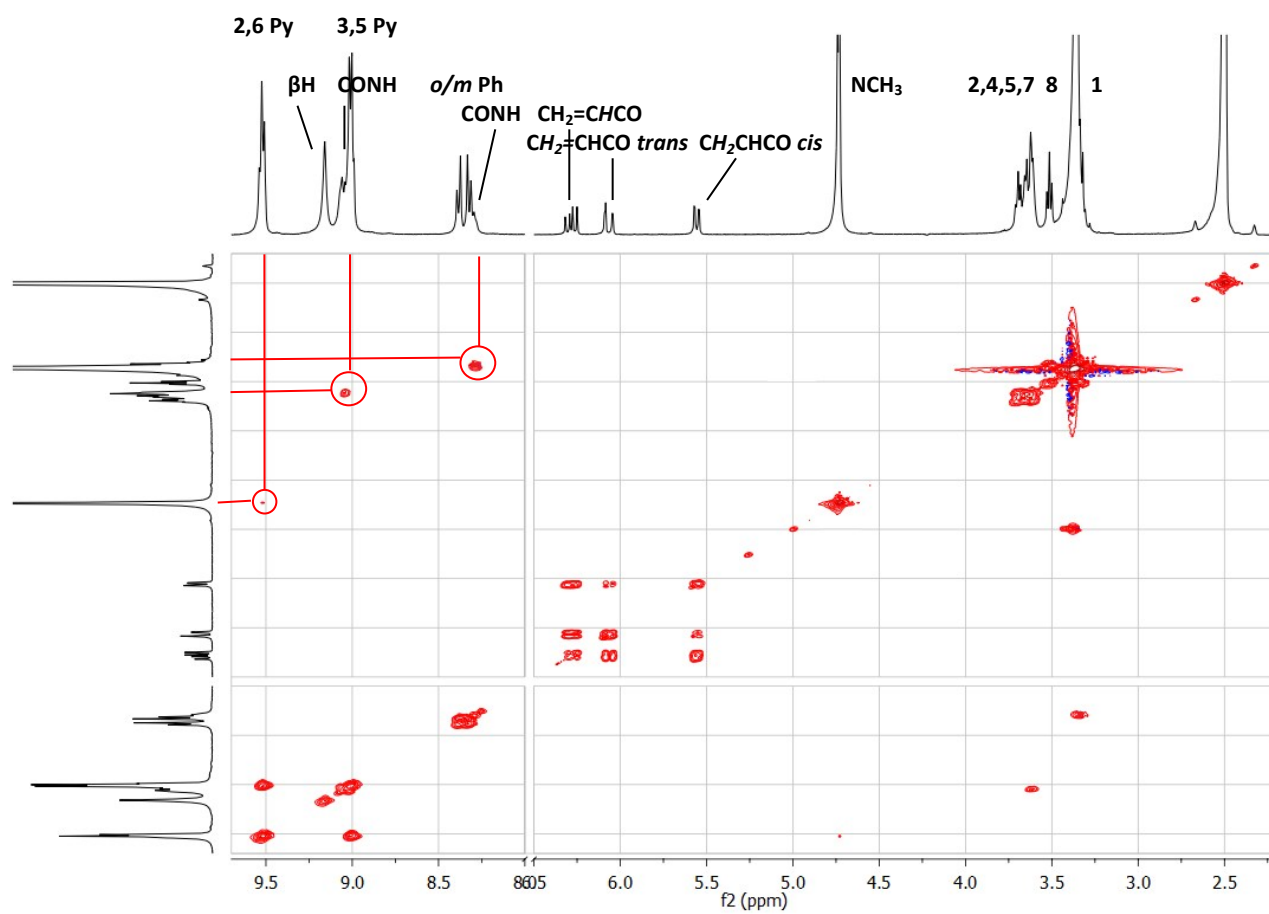

**Figure S8.** H-H COSY of **5** in DMSO-*d*<sub>6</sub>

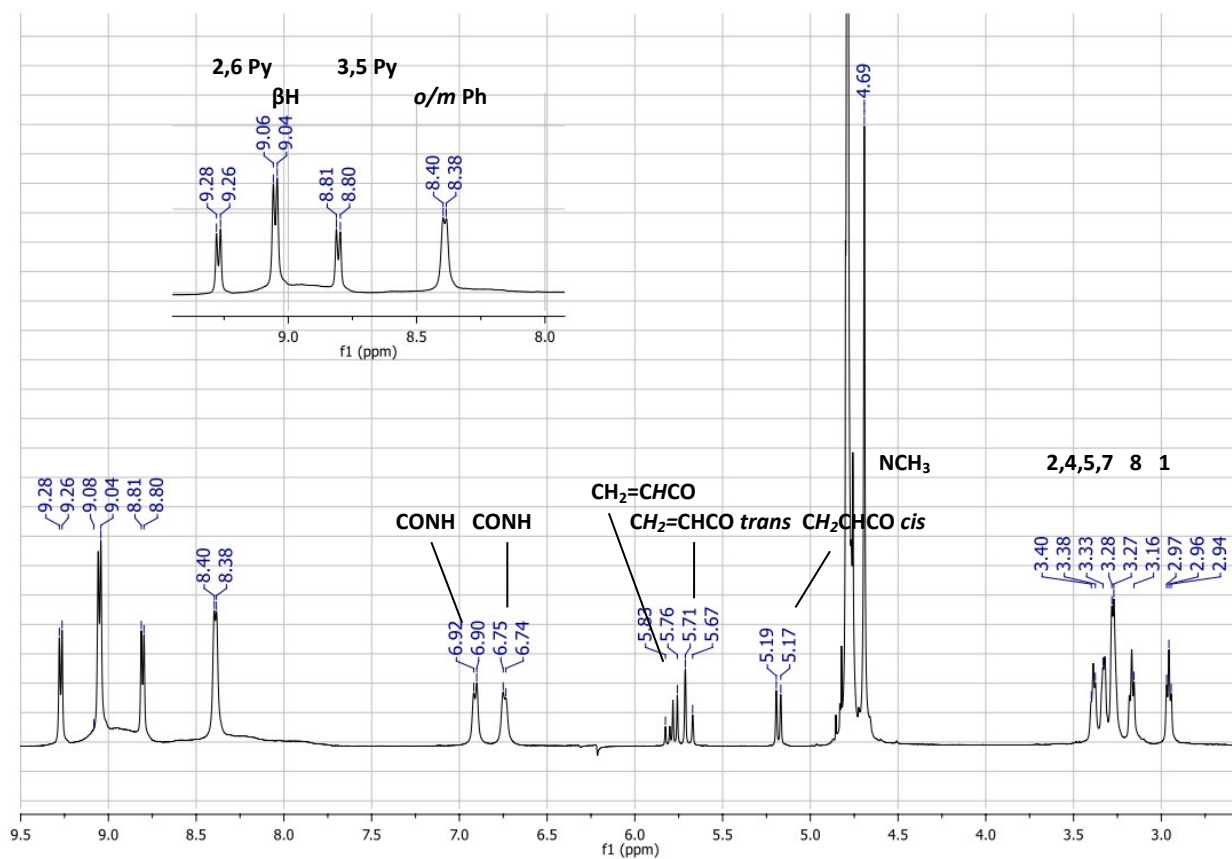

**Figure S9.**  $^1\text{H}$  NMR spectrum of **5** in  $\text{D}_2\text{O}$



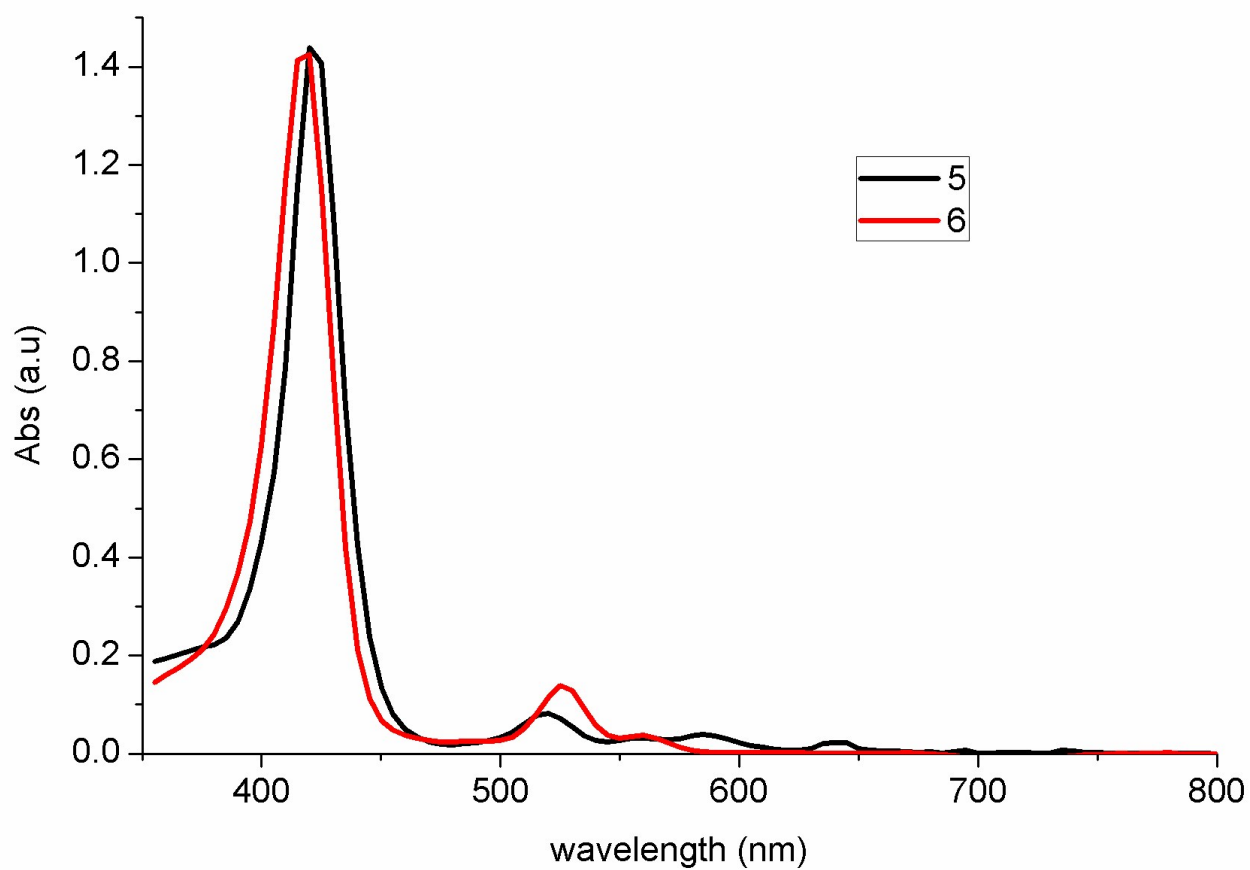

**Figure S10 (a).** Absorption spectra of **5** and **6** in PBS (pH=6.0).

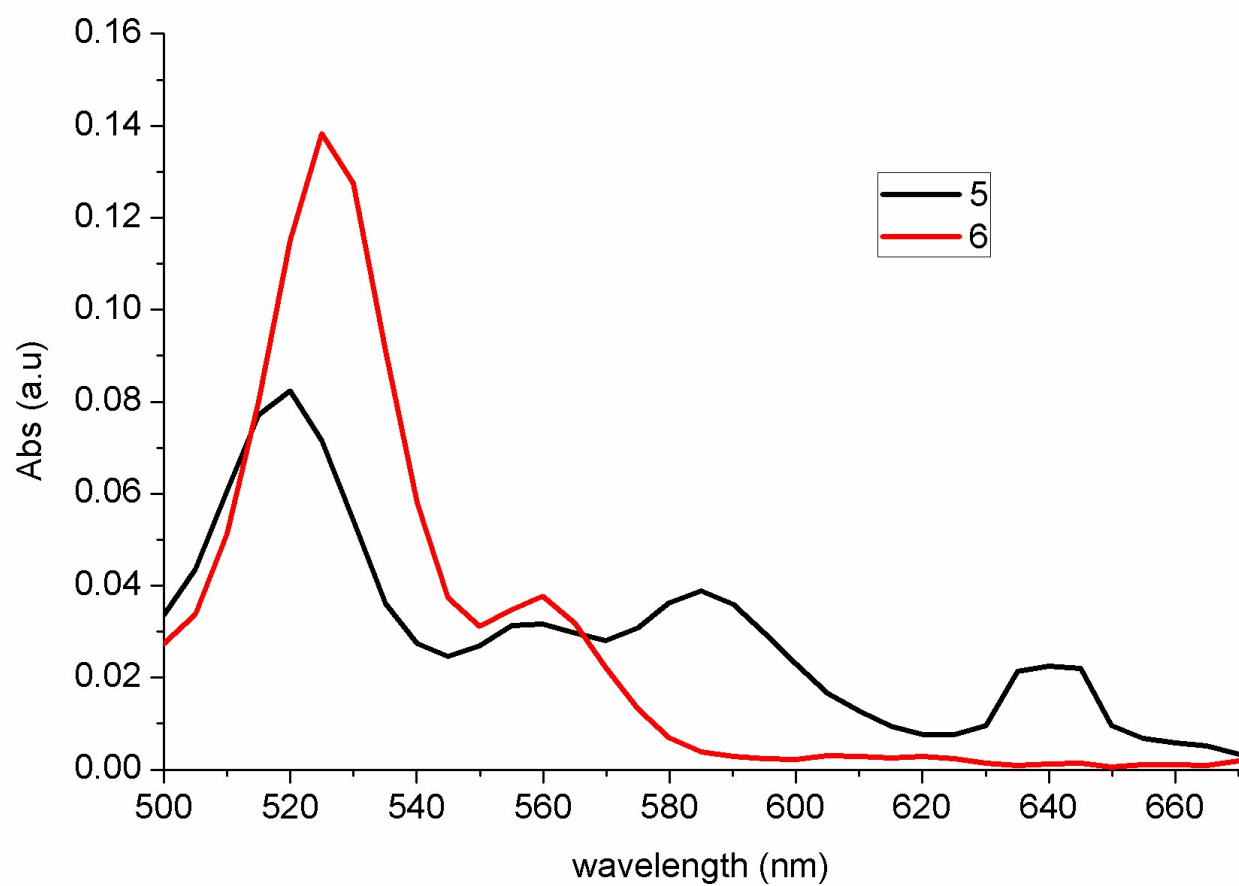

**Figure S10 (b).**Wavelength range 500-660 nm, absorption spectra of **5** and **6** in PBS (pH=6.0).

## Compound 5 + 6 co-injection

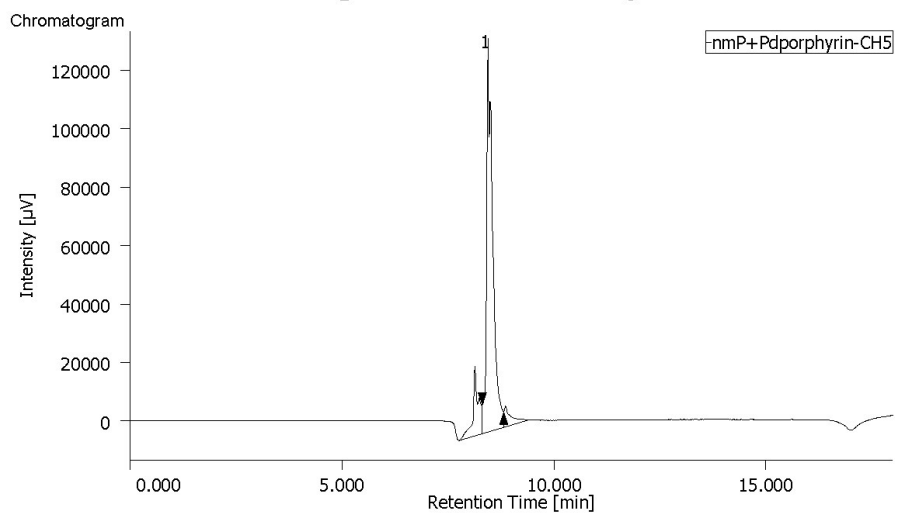

### Peak Information

| Peak Name | tR [min]    | Area [μV·sec] | Height [μV] | Area%   | Height% | Quantity | NTP   | Selectivity | Symmetry Factor | Warning |
|-----------|-------------|---------------|-------------|---------|---------|----------|-------|-------------|-----------------|---------|
| 5 + 6     | 8.440       | 1321210       | 130487      | 100.000 | 100.000 | N/A      | 18607 | N/A         | N/A             |         |
| Peak Name | Peak Factor |               |             |         |         |          |       |             |                 |         |
| 5 + 6     | 1.00000     |               |             |         |         |          |       |             |                 |         |

**Figure S11.** HPLC trace of the water soluble porphyrin **5** and **6** co-injected for qualitative comparison. Gradient: see Material and Methods.

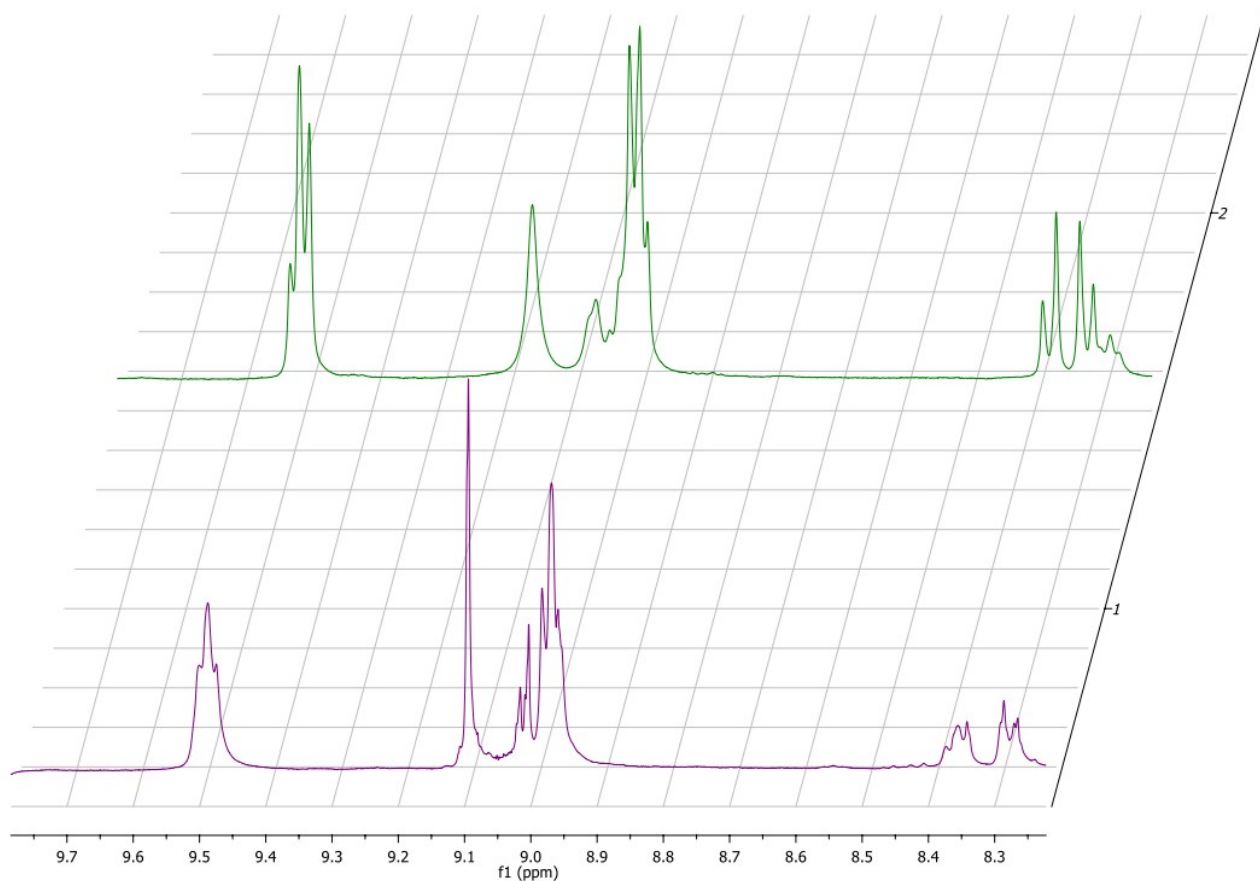

**Figure S12.** Superimposition of <sup>1</sup>H NMR spectrum of **6** in DMSO-*d*<sub>6</sub> (bottom) and <sup>1</sup>H NMR spectrum of **5** in DMSO-*d*<sub>6</sub> (up).

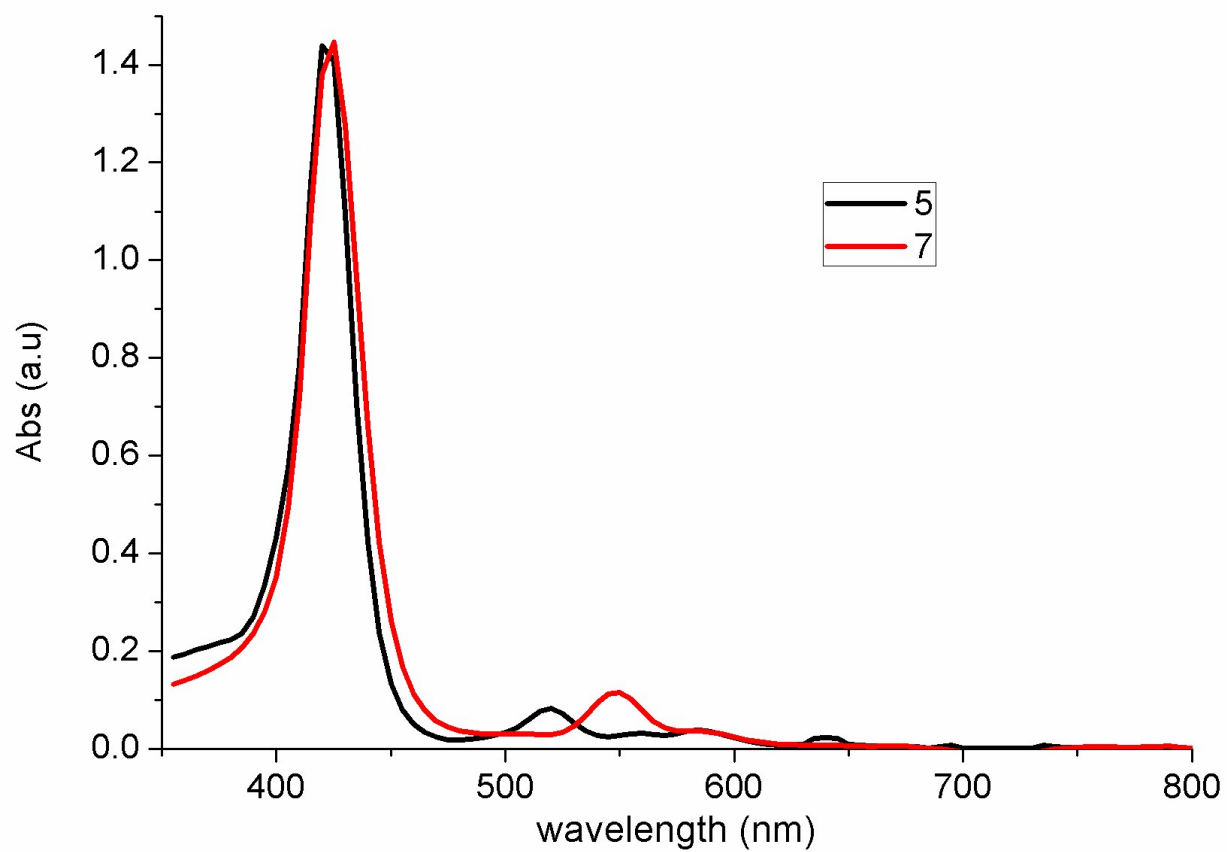

**Figure S13 (a).** Absorption spectra of **5** and **7** in PBS.

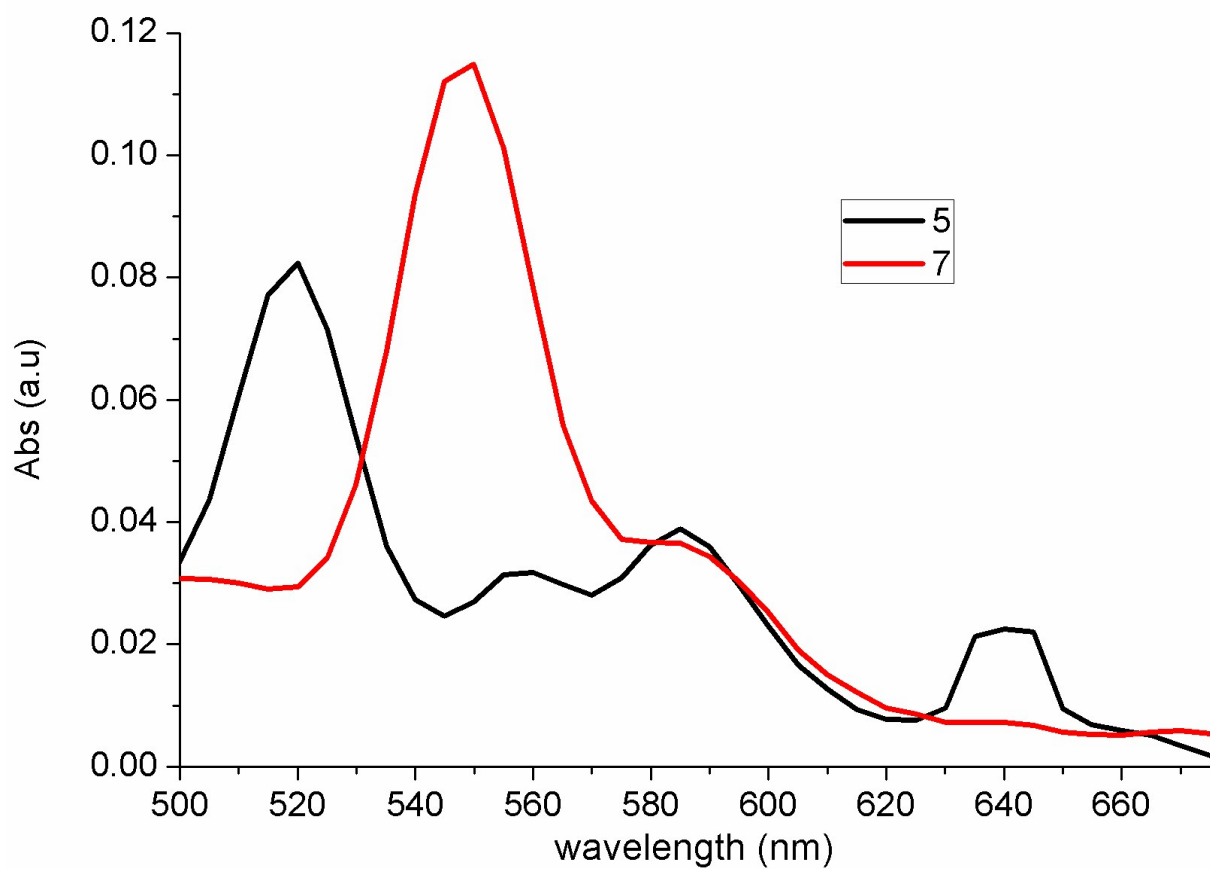

**Figure S13 (b).**Wavelength range 500-660 nm, absorption spectra of **5** and **7** in PBS.

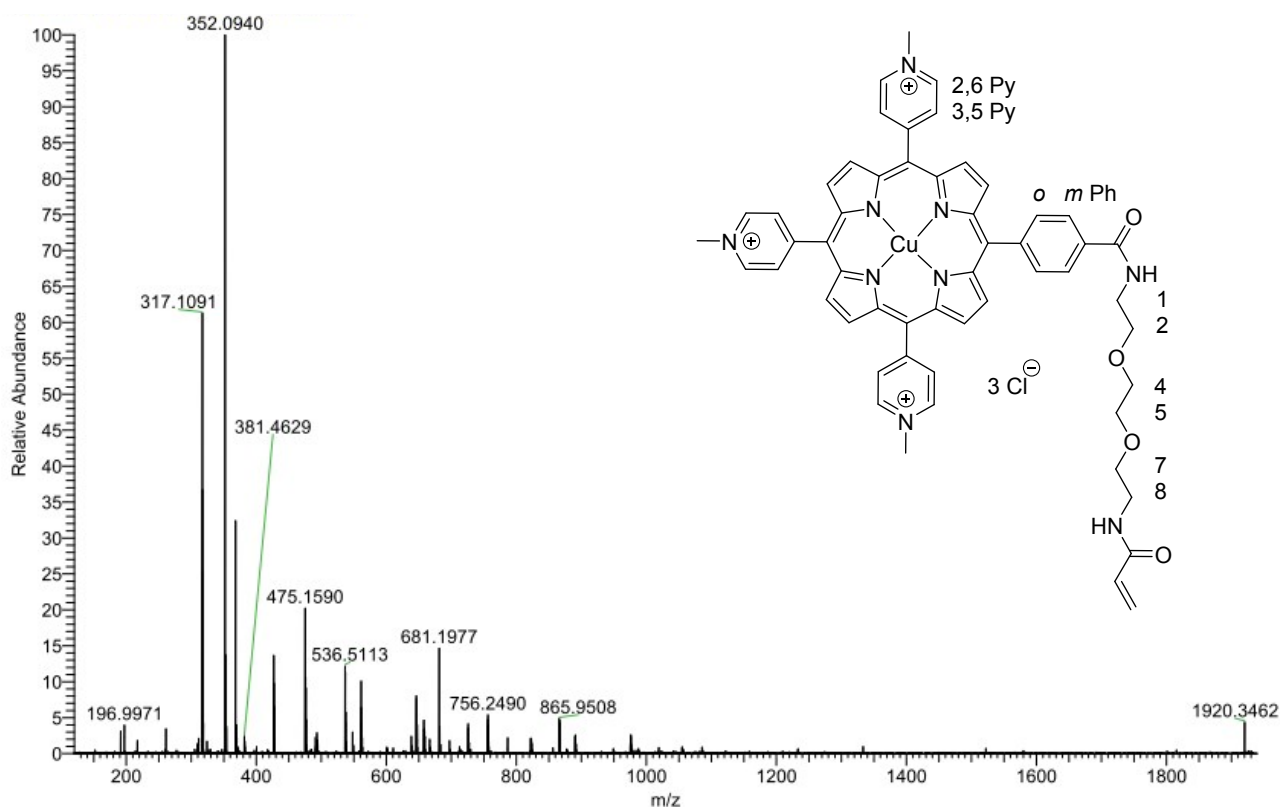

**Figure S14.** ESI-MS (m/z) (MeOH + NH<sub>4</sub>OAc),: calcd. for **7** (C<sub>54</sub>H<sub>52</sub>N<sub>9</sub>O<sub>4</sub>Cl<sub>3</sub>): 317.1091 (z=3); found (M – 3Cl)<sup>3+</sup> 317.1088.

### Compound 5 + 7 co-injection

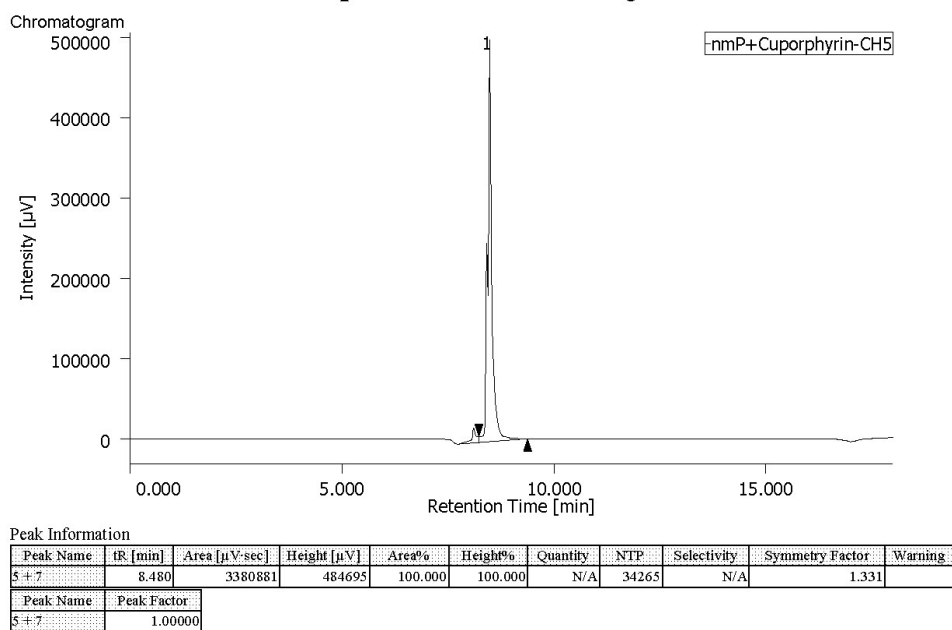

**Figure S15.** HPLC trace of the water soluble porphyrin **5** and **7** co-injected for qualitative comparison. Gradient: see Material and Methods.

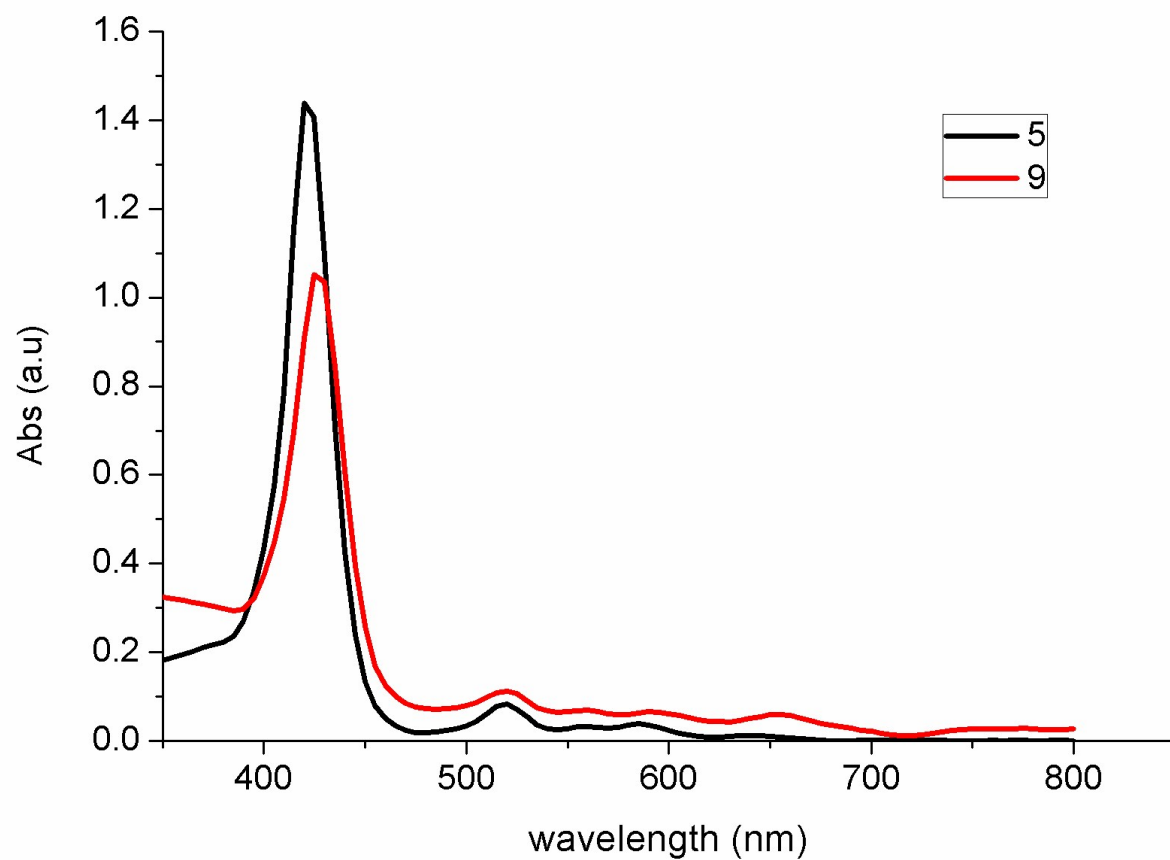

**Figure S16.** Absorption spectra of **5** and **9**.



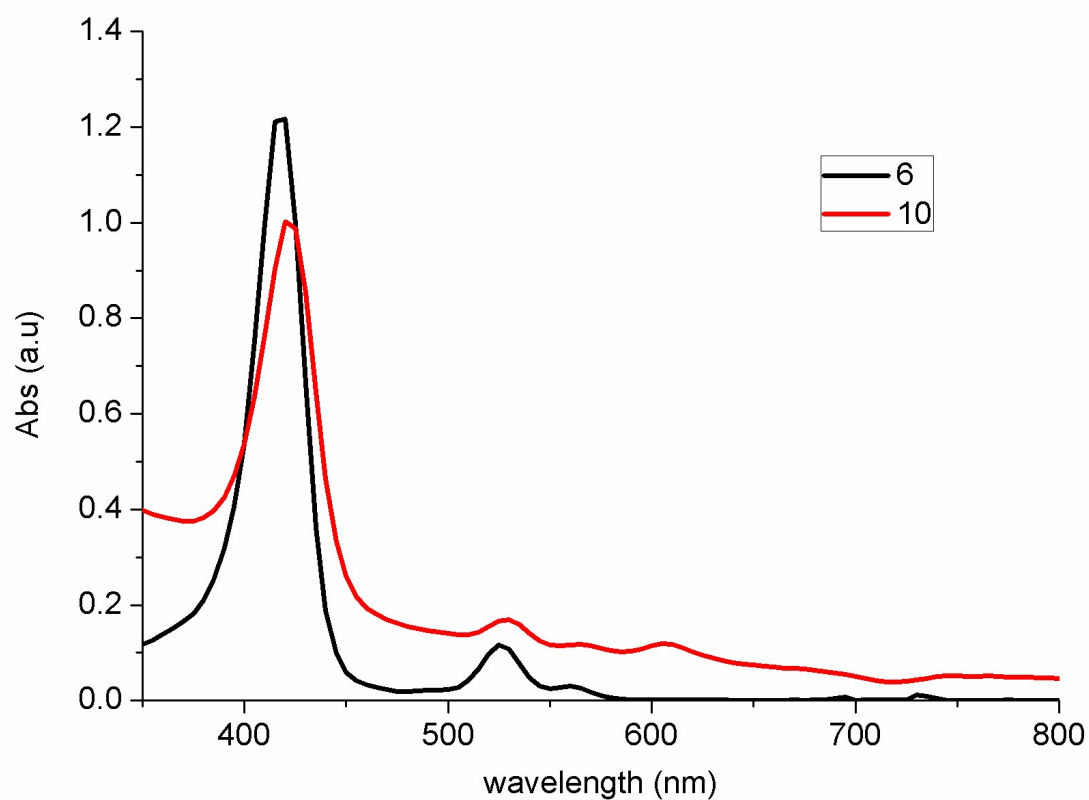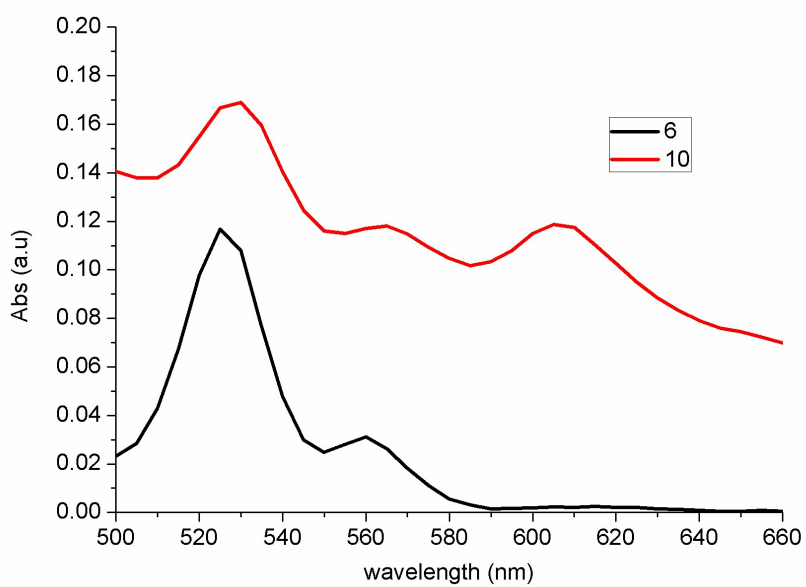

**Figure S17.** Absorption spectra of **6** and **10**.

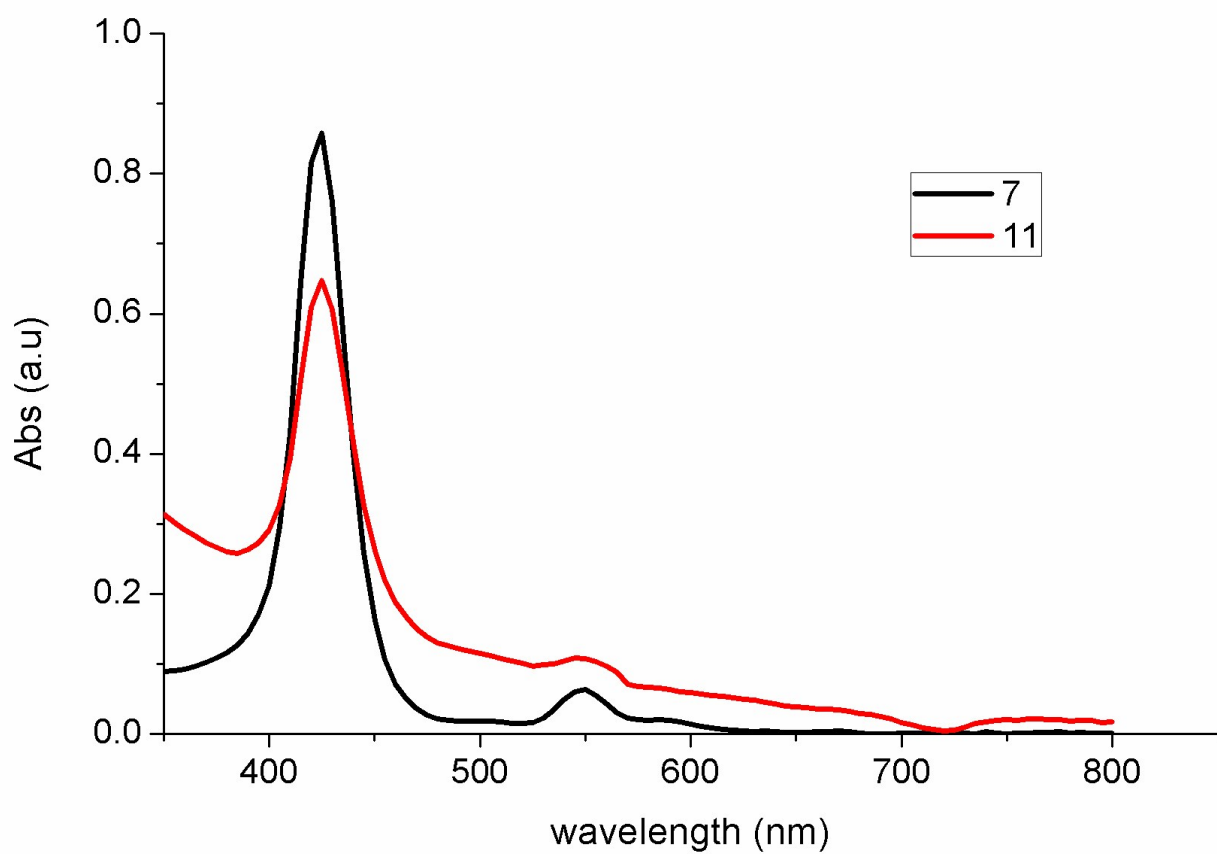

**Figure S18.** Absorption spectra of **7** and **11**.

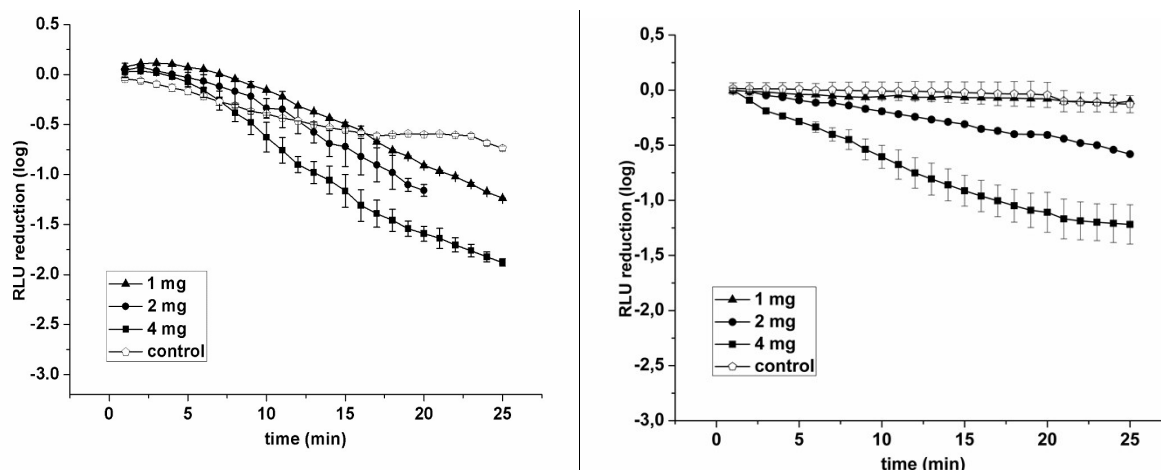

**Figure S19.** Kill curves obtained for the 1 mg/cm<sup>3</sup>, 2 mg/cm<sup>3</sup> and 4 mg/cm<sup>3</sup> photoantimicrobial hydrogel previously cut in 4 squares against *E. coli* under light illumination (a) for 25 min (fluence rate of 14.5 mW/cm<sup>2</sup> and a total light dose 21.8 J/cm<sup>2</sup>) and in the dark (b). Dark and light experiments were done with the cell suspensions of  $2 \times 10^6$  CFU ml<sup>-1</sup>. The optical fiber was placed 6 cm from the plates. Values represent the mean of two separate experiments.

The filled triangles correspond to the killing curve obtained adding 1 mg/cm<sup>3</sup> to the *E. coli* suspension while the filled circles correspond to the killing curve obtained adding 2 mg/cm<sup>3</sup> to the *E. coli* suspension. The filled squares corresponds to the killing curve obtained adding 4 mg/cm<sup>3</sup> hydrogel to the *E. coli* suspension.

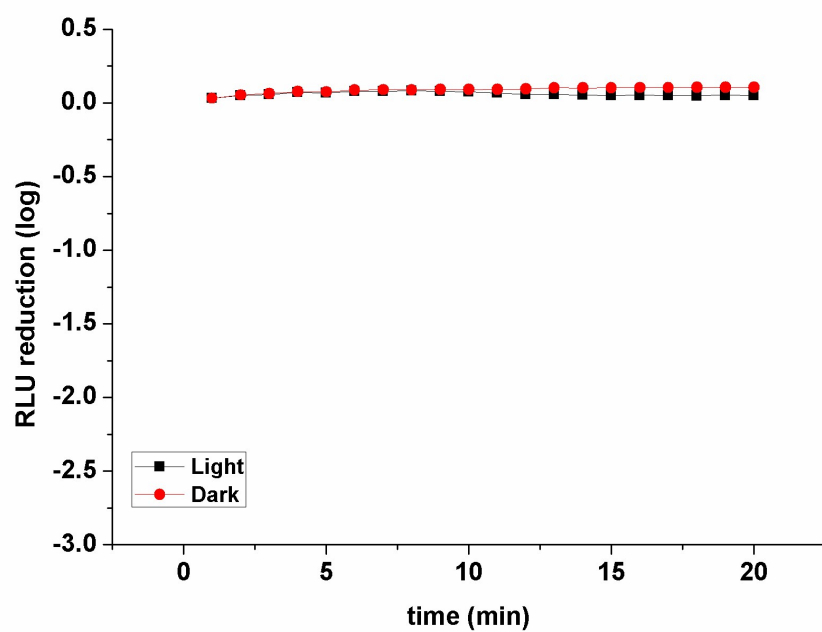

**Figure S20.** Control experiment on an *E. coli* suspension irradiated and in the dark indicated that light doses alone up to 21.8 J cm<sup>2</sup>.
